# Supplementary material for: Long-term survival with sickle cell disease: a nationwide cohort study of Medicare and Medicaid beneficiaries
Source: PubMed Central journal article supplement — Blood Adv. 2023 Mar 20;7(13):3276–83. doi: 10.1182/bloodadvances.2022009202 (PMC10336259; doi:10.1182/bloodadvances.2022009202), 2023-03-20
Supplement: BLOODA_ADV-2022-009202-mmc1.pdf [file BLOODA_ADV-2022-009202-mmc1.pdf]

## Supplementary Materials

**Title:** Long-Term Survival of Individuals with Sickle Cell Disease: A Nationwide Cohort Study of Medicare and Medicaid Beneficiaries

**Short Title:** Long-Term Survival in Sickle Cell Disease

**Authors:**

Boshen Jiao, PhD, MPH<sup>1</sup>; Kate M. Johnson, PhD<sup>1,6</sup>; Scott D. Ramsey MD, PhD<sup>1,2</sup>; M. A. Bender, MD<sup>3</sup>; Beth Devine, PhD<sup>1,4</sup>; Anirban Basu, PhD<sup>1,4,5</sup>

**Affiliations:**

1. The Comparative Health Outcomes, Policy & Economics (CHOICE) Institute, Department of Pharmacy, University of Washington
2. Division of Public Health Sciences and Hutchinson Institute for Cancer Outcomes Research, Fred Hutchinson Cancer Research Center
3. Department of Pediatrics, University of Washington, and Clinical Research Division, Fred Hutchinson Cancer Research Center
4. Department of Health Services, University of Washington
5. Department of Economics, University of Washington
6. Division of Respiratory Medicine, Department of Medicine, Faculty of Medicine, University of British Columbia, Canada BC.

Appendix Figure 1. Cumulative mortality curves for all the individuals with sickle cell disease (top panel) and by sex (bottom panel)

Appendix Figure 2. Cumulative mortality curves for individuals with sickle cell disease by insurance status: Medicare OASI (Panel A), Medicare DIB or ESRD (Panel B), Medicaid (Panel C), and dually eligible for Medicare and Medicaid (Panel D)

Appendix Figure 3. Cumulative mortality curves for individuals with sickle cell disease by insurance status and sex: Medicare OASI (Panel A), Medicare DIB or ESRD (Panel B), Medicaid (Panel C), and dually eligible for Medicare and Medicaid (Panel D)

Appendix Table 1. Diagnosis codes used in Chronic Conditions Data Warehouse's definition of sickle cell disease

Appendix Table 2. Life expectancies (95% CI) at different ages for Black and non-Black individuals with sickle cell disease

Appendix Table 3. Life expectancies (95% CI) at different ages for individuals with sickle cell disease covered by Medicare DIB only, Medicare ESRD only, and Medicare DIB and ESRD

Appendix Figure 1. Cumulative mortality curves for all the individuals with sickle cell disease (top panel) and by sex (bottom panel)

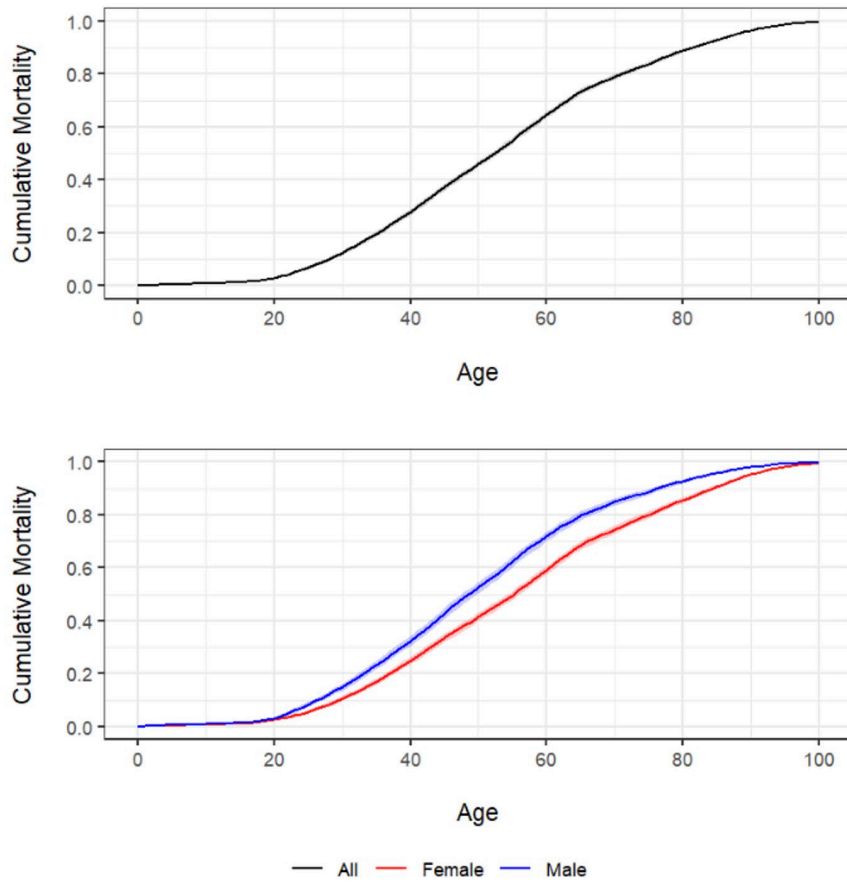

Appendix Figure 2. Cumulative mortality curves for individuals with sickle cell disease by insurance status: Medicare OASI (Panel A), Medicare DIB or ESRD (Panel B), Medicaid (Panel C), and dually eligible for Medicare and Medicaid (Panel D)

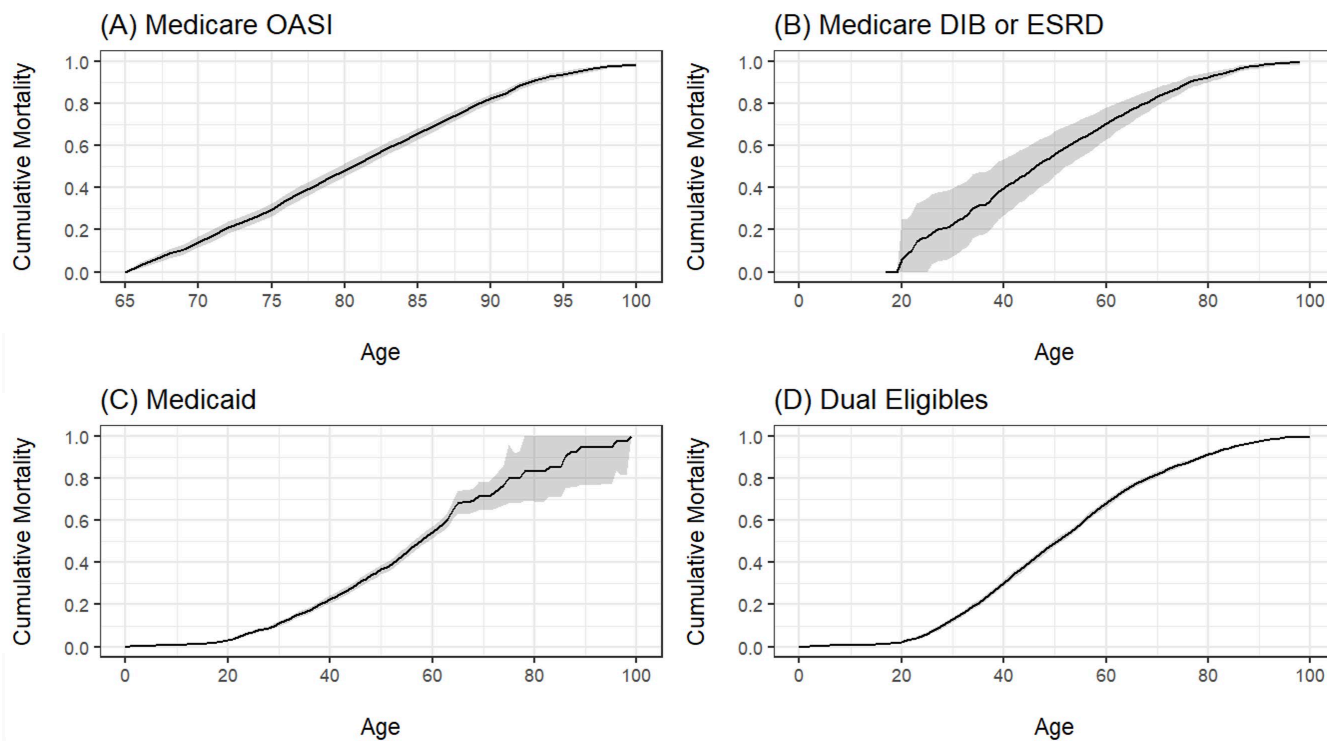

Appendix Figure 3. Cumulative mortality curves for individuals with sickle cell disease by insurance status and sex: Medicare OASI (Panel A), Medicare DIB or ESRD (Panel B), Medicaid (Panel C), and dually eligible for Medicare and Medicaid (Panel D)

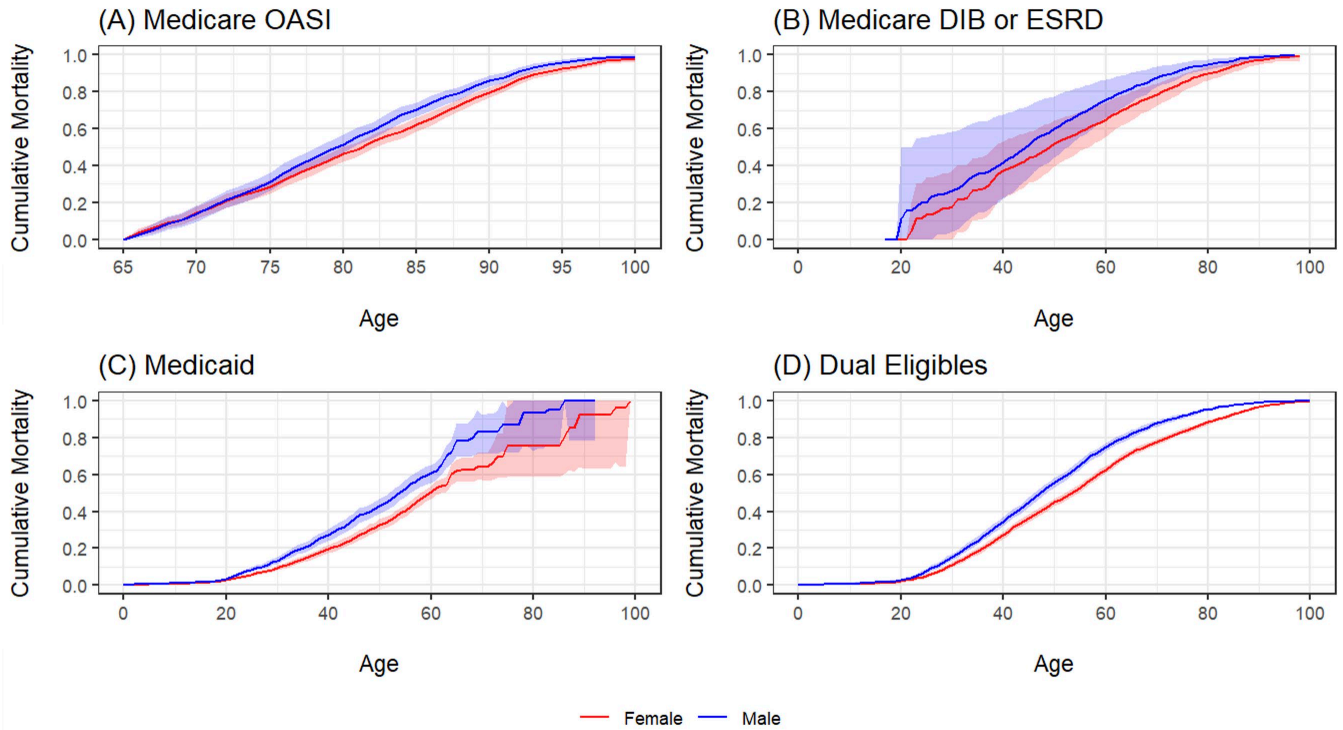

Appendix Table 1. Diagnosis codes used in Chronic Conditions Data Warehouse’s definition of sickle cell disease

|              |                                                                                                                                                                                                                                                                                                                        |
|--------------|------------------------------------------------------------------------------------------------------------------------------------------------------------------------------------------------------------------------------------------------------------------------------------------------------------------------|
| ICD-9 codes  | 282.41, 282.42, 282.60, 282.61, 282.62, 282.63, 282.64, 282.68, 282.69                                                                                                                                                                                                                                                 |
| ICD-10 codes | D57.00, D57.01, D57.02, D57.03, D57.09, D57.1, D57.20, D57.211, D57.212, D57.213, D57.218, D57.219, D57.40, D57.411, D57.412, D57.413, D57.418, D57.419, D57.42, D57.431, D57.432, D57.433, D57.438, D57.439, D57.44, D57.451, D57.452, D57.453, D57.458, D57.459, D57.80, D57.811, D57.812, D57.813, D57.818, D57.819 |

Reference: *Chronic Conditions Data Warehouse. Other Chronic Health, Mental Health, and Potentially Disabling Conditions: Sickle Cell Disease. Chronic Conditions Data Warehouse. Published February 2022. Accessed August 1, 2022. <https://www2.ccwdata.org/condition-categories-other>*

Appendix Table 2. Life expectancies (95% CI) at different ages for Black and non-Black individuals with sickle cell disease

| <b>Age</b>    | <b>Black Individuals</b> | <b>Non-Black Individuals</b> |
|---------------|--------------------------|------------------------------|
| <b>All</b>    |                          |                              |
| Birth         | 52.2 (51.4, 53.1)        | 55.1 (53.2, 57.0)            |
| 18            | 34.9 (34.3, 35.7)        | 38.3 (36.7, 39.9)            |
| 35            | 23.8 (23.3, 24.3)        | 25.9 (24.8, 27.1)            |
| 45            | 19.3 (18.8, 19.7)        | 20.8 (20.0, 21.6)            |
| 65            | 12.9 (12.4, 13.3)        | 13.6 (13.1, 13.9)            |
| 85            | 5.4 (4.9, 6.1)           | 5.4 (5.1, 5.6)               |
| <b>Female</b> |                          |                              |
| Birth         | 54.6 (53.5, 55.7)        | 58.3 (55.8, 60.9)            |
| 18            | 37.2 (36.3, 38.1)        | 41.4 (39.3, 43.6)            |
| 35            | 25.5 (24.9, 26.2)        | 28.4 (26.8, 30.0)            |
| 45            | 20.9 (20.3, 21.5)        | 23.0 (21.9, 24.1)            |
| 65            | 13.6 (13.1, 14.1)        | 14.5 (14.2, 14.8)            |
| 85            | 5.5 (4.9, 6.2)           | 5.6 (5.3, 5.9)               |
| <b>Male</b>   |                          |                              |
| Birth         | 49.0 (47.8, 50.3)        | 50.9 (48.2, 53.7)            |
| 18            | 31.8 (30.8, 32.8)        | 34.1 (31.7, 36.5)            |
| 35            | 21.1 (20.4, 21.9)        | 22.5 (20.8, 24.2)            |
| 45            | 16.8 (16.2, 17.5)        | 17.8 (16.5, 18.9)            |
| 65            | 11.4 (10.8, 12.1)        | 12.2 (11.9, 12.5)            |
| 85            | 5.3 (4.3, 6.6)           | 4.9 (4.5, 5.2)               |

Appendix Table 3. Life expectancies (95% CI) at different ages for individuals with sickle cell disease covered by Medicare DIB only, Medicare ESRD only, and Medicare DIB and ESRD

| <b>Age</b> | <b>Medicare DIB only</b> | <b>Medicare ESRD only</b> | <b>Medicare DIB and ESRD</b> |
|------------|--------------------------|---------------------------|------------------------------|
| 18         | 31.1 (23.9, 37.5)        | -                         | -                            |
| 35         | 24.5 (24.1, 25.3)        | 10.7 (0.0, 19.3)          | -                            |
| 45         | 19.9 (19.4, 20.4)        | 8.6 (0.0, 13.3)           | 10.8 (0, 11.8)               |
| 65         | 11.4 (10.8, 11.9)        | 6.3 (0.0, 8.7)            | 6.5 (0.0, 7.7)               |
| 85         | 4.7 (3.5, 6.0)           | -                         | -                            |
